# Supplementary material for: Predicting resprouting of Platanus × hispanica following branch pruning by means of machine learning
Source: Frontiers journal article supplement (doi:10.3389/fpls.2024.1297390), 2024-03-07
Supplement: Data_Sheet_1.zip [file Data_Sheet_1.zip]

Table-topped  
*Platanus × hispanica*

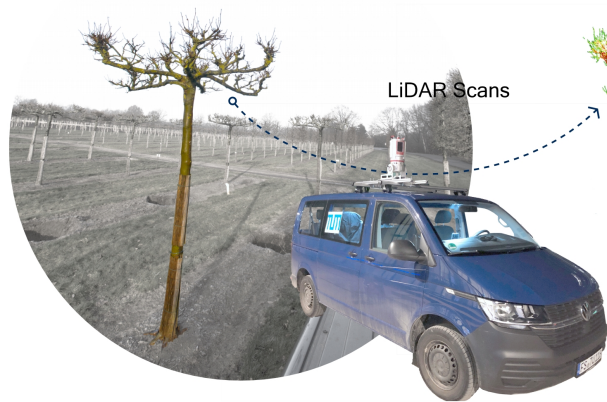

a

LiDAR Scans

b

Segmented  
Point Cloud

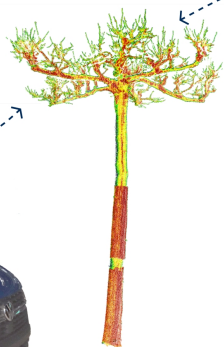

c

Zoom in

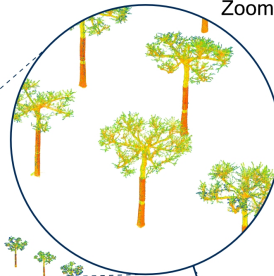

49 *Platanus* were  
scanned in Jan. 2022

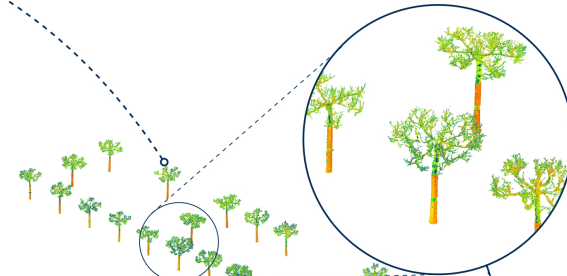

28 *Platanus* were left  
in Jan. 2023

d

Low  
Medium  
High  
Point Intensity

Zoom in

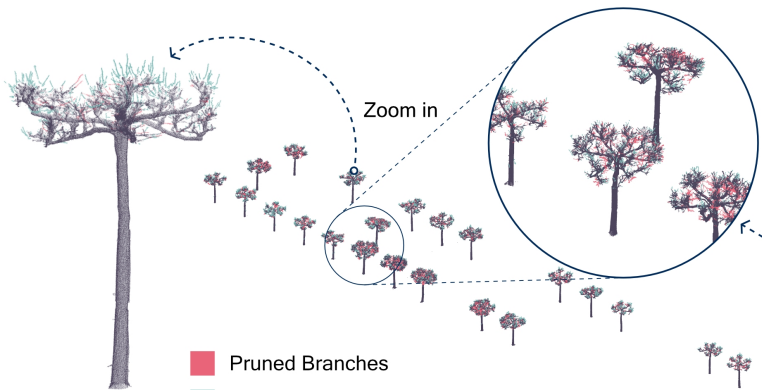

e

Pruned Branches  
New Shoots  
Tree Structure Base

Combine  
segmented  
point sets

Disappeared parts in  
the year 2022 represent  
pruned branches

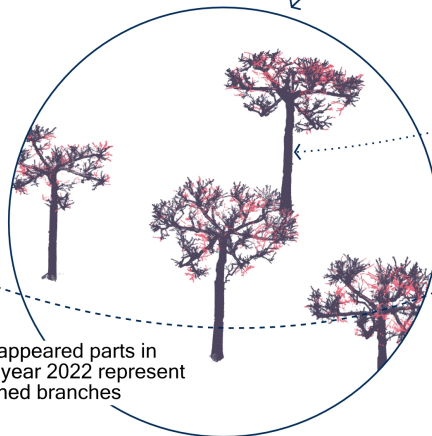

Distance below  
the threshold

Pruned Branches  
Tree Structure Base

f

Appeared parts in the  
year 2023 represent  
new shoots

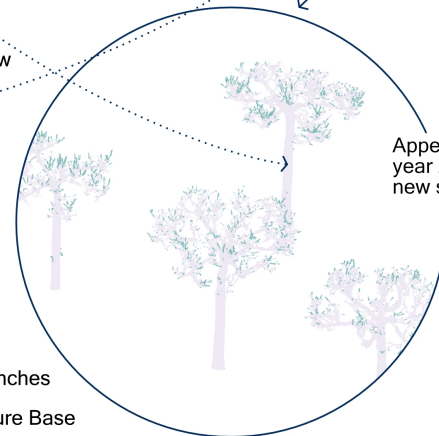

New Shoots  
Leave Out Structure
