# Supplementary material for: Predicting resprouting of Platanus × hispanica following branch pruning by means of machine learning
Source: Frontiers journal article supplement (doi:10.3389/fpls.2024.1297390), 2024-03-07

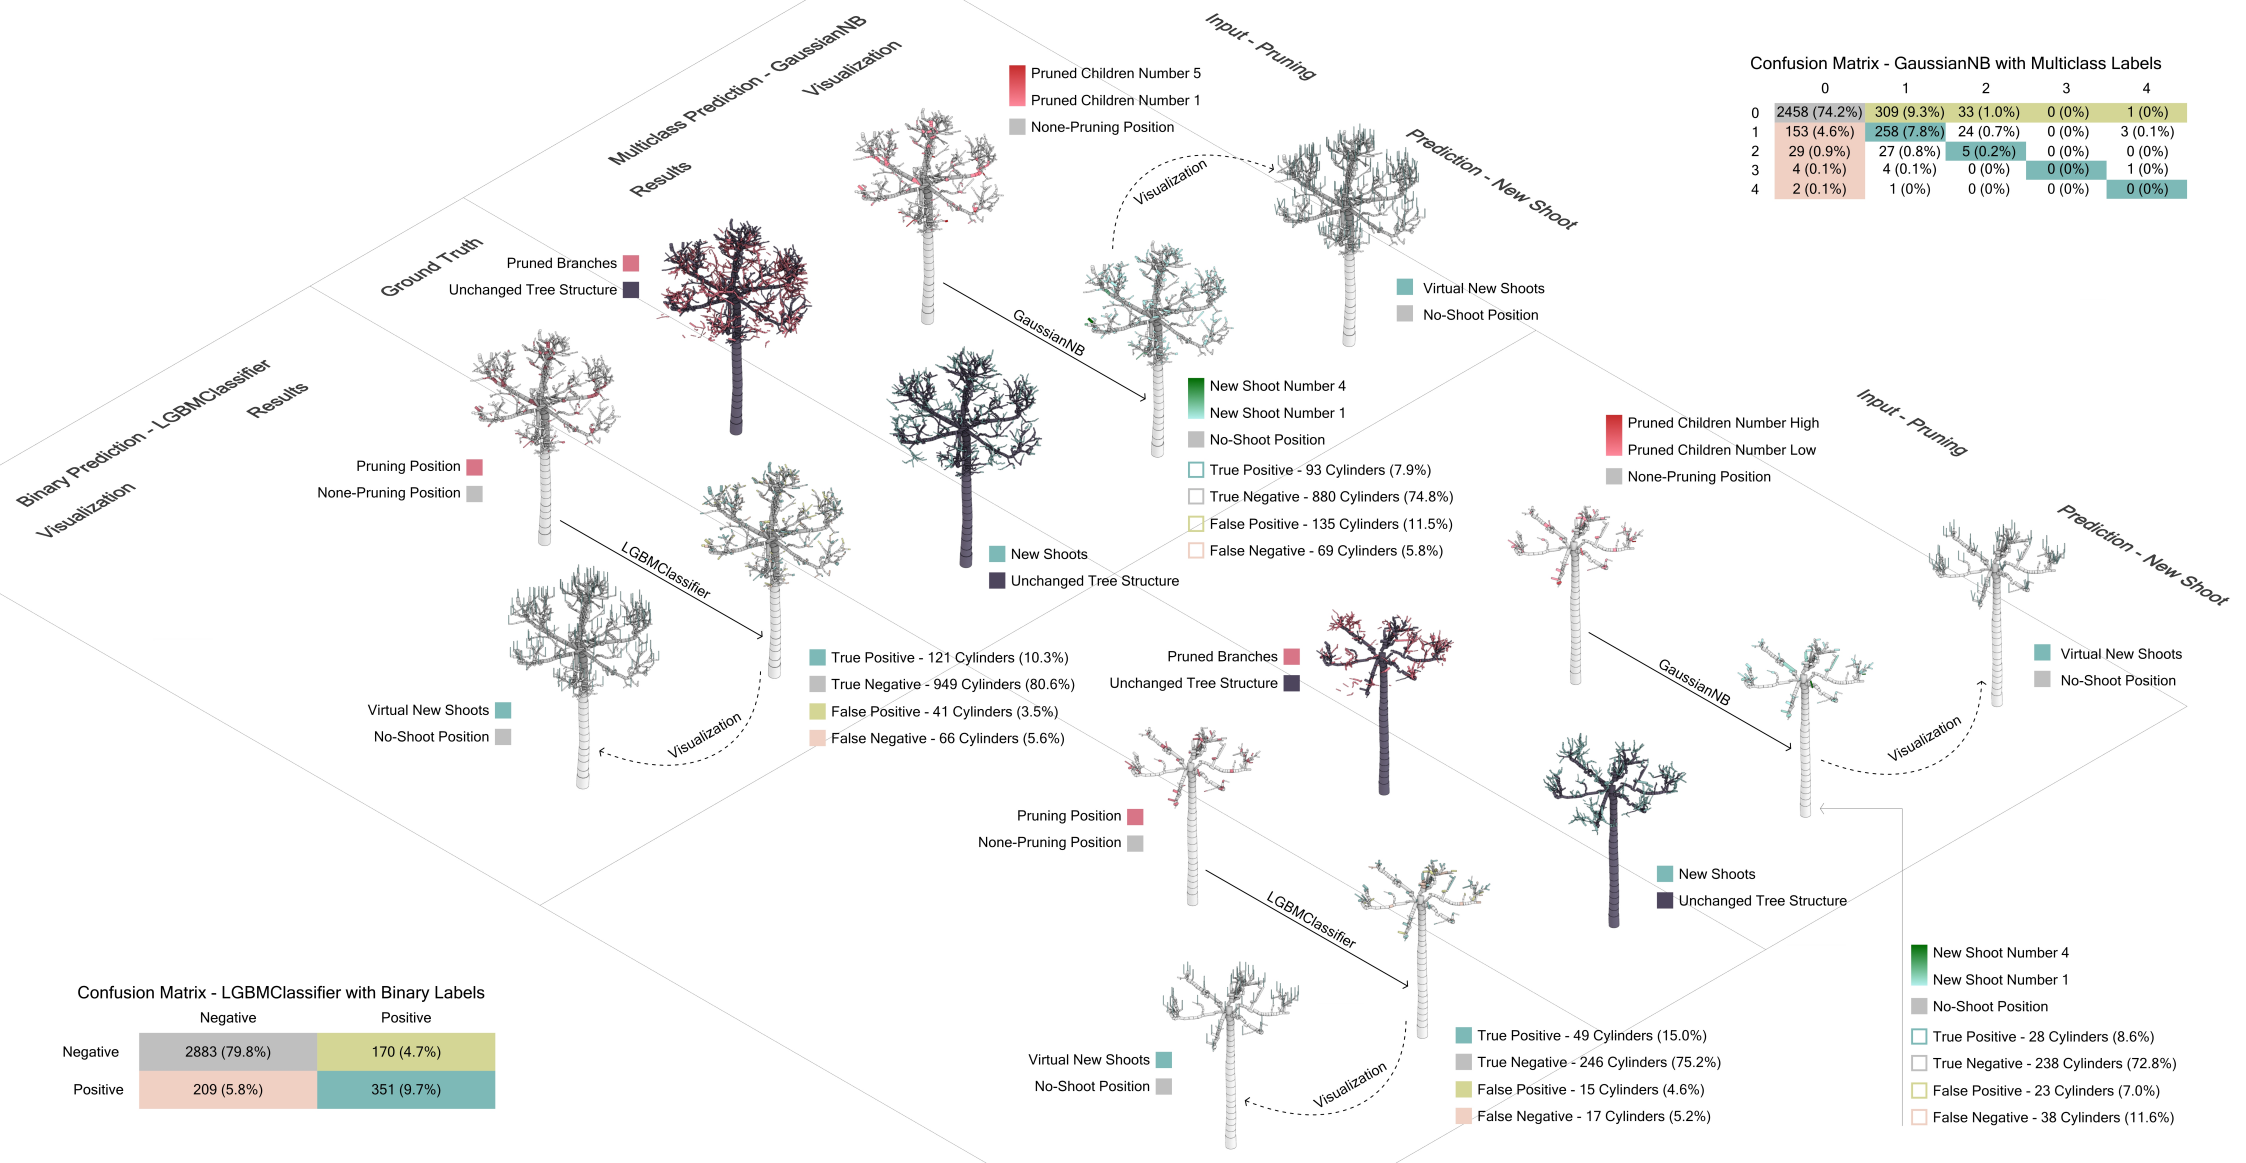

Supplement: Data_Sheet_1.zip [file Data_Sheet_1.zip]
